# Supplementary material
Source: Springer Nature journal article supplement (https://www.springermedizin.de/resource/supplementary/12936_2011_1925_MOESM14_ESM.pdf/9542072)

**Provider cost per case averted**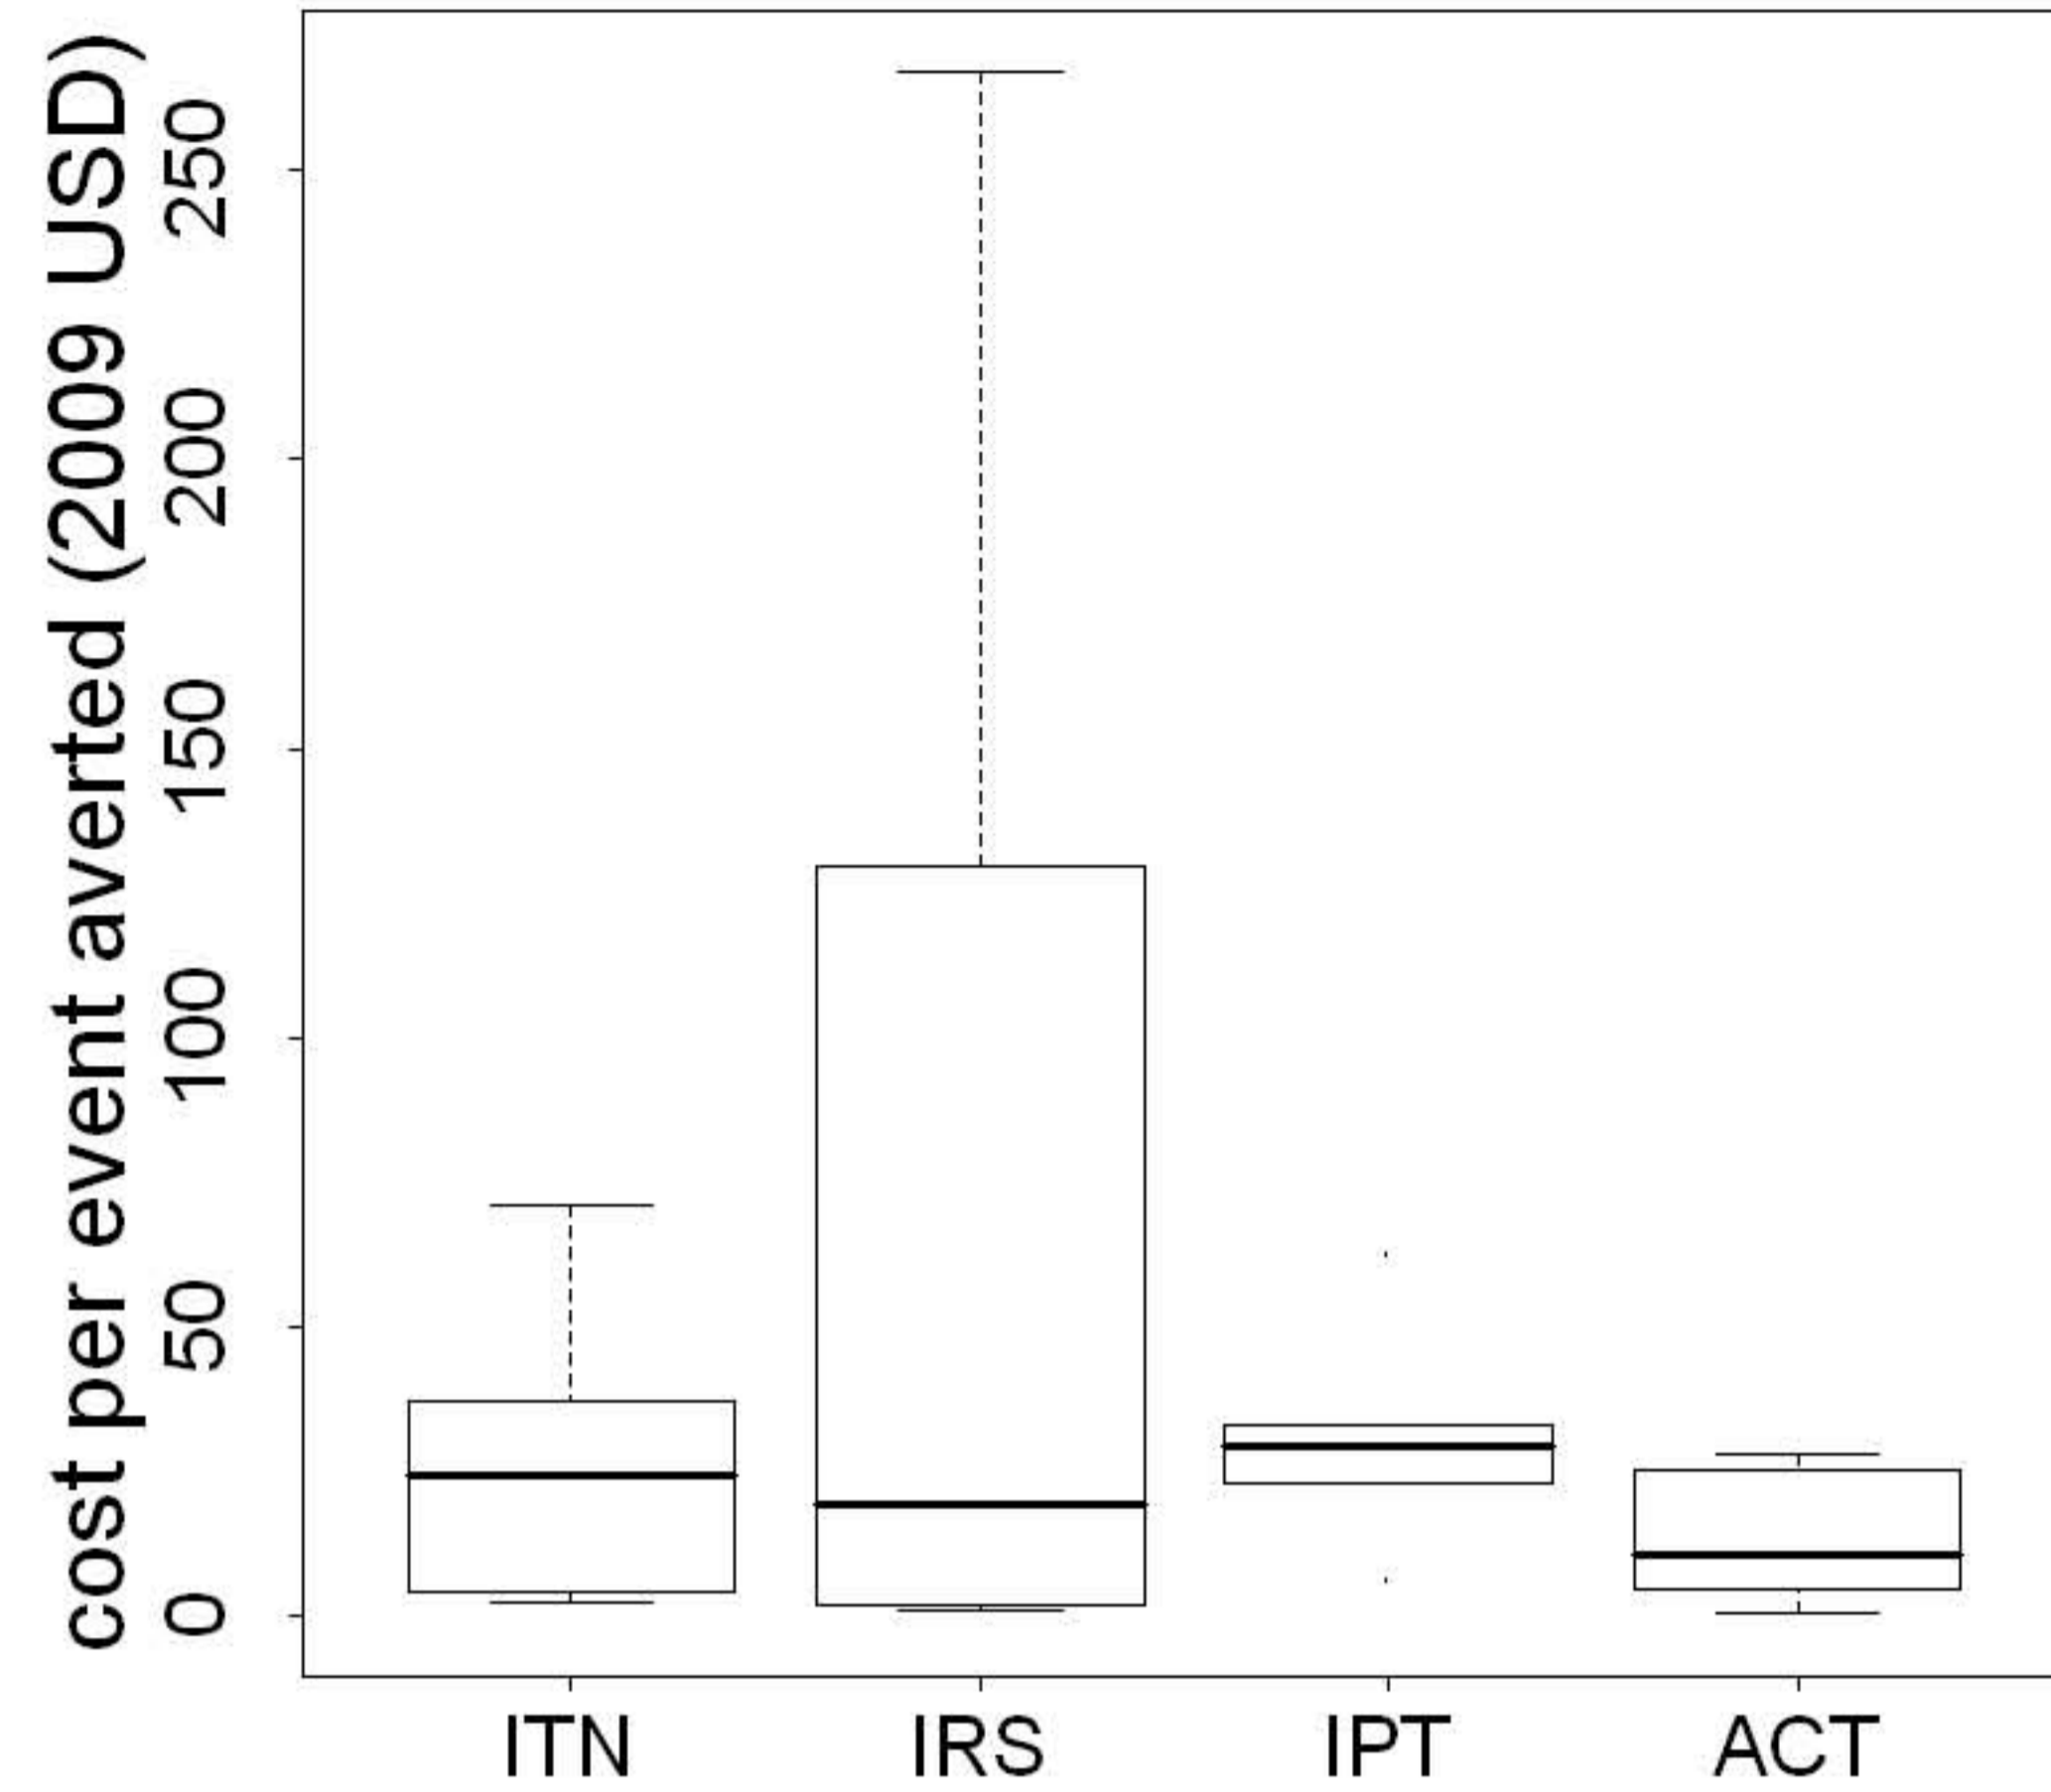**Provider cost per death averted**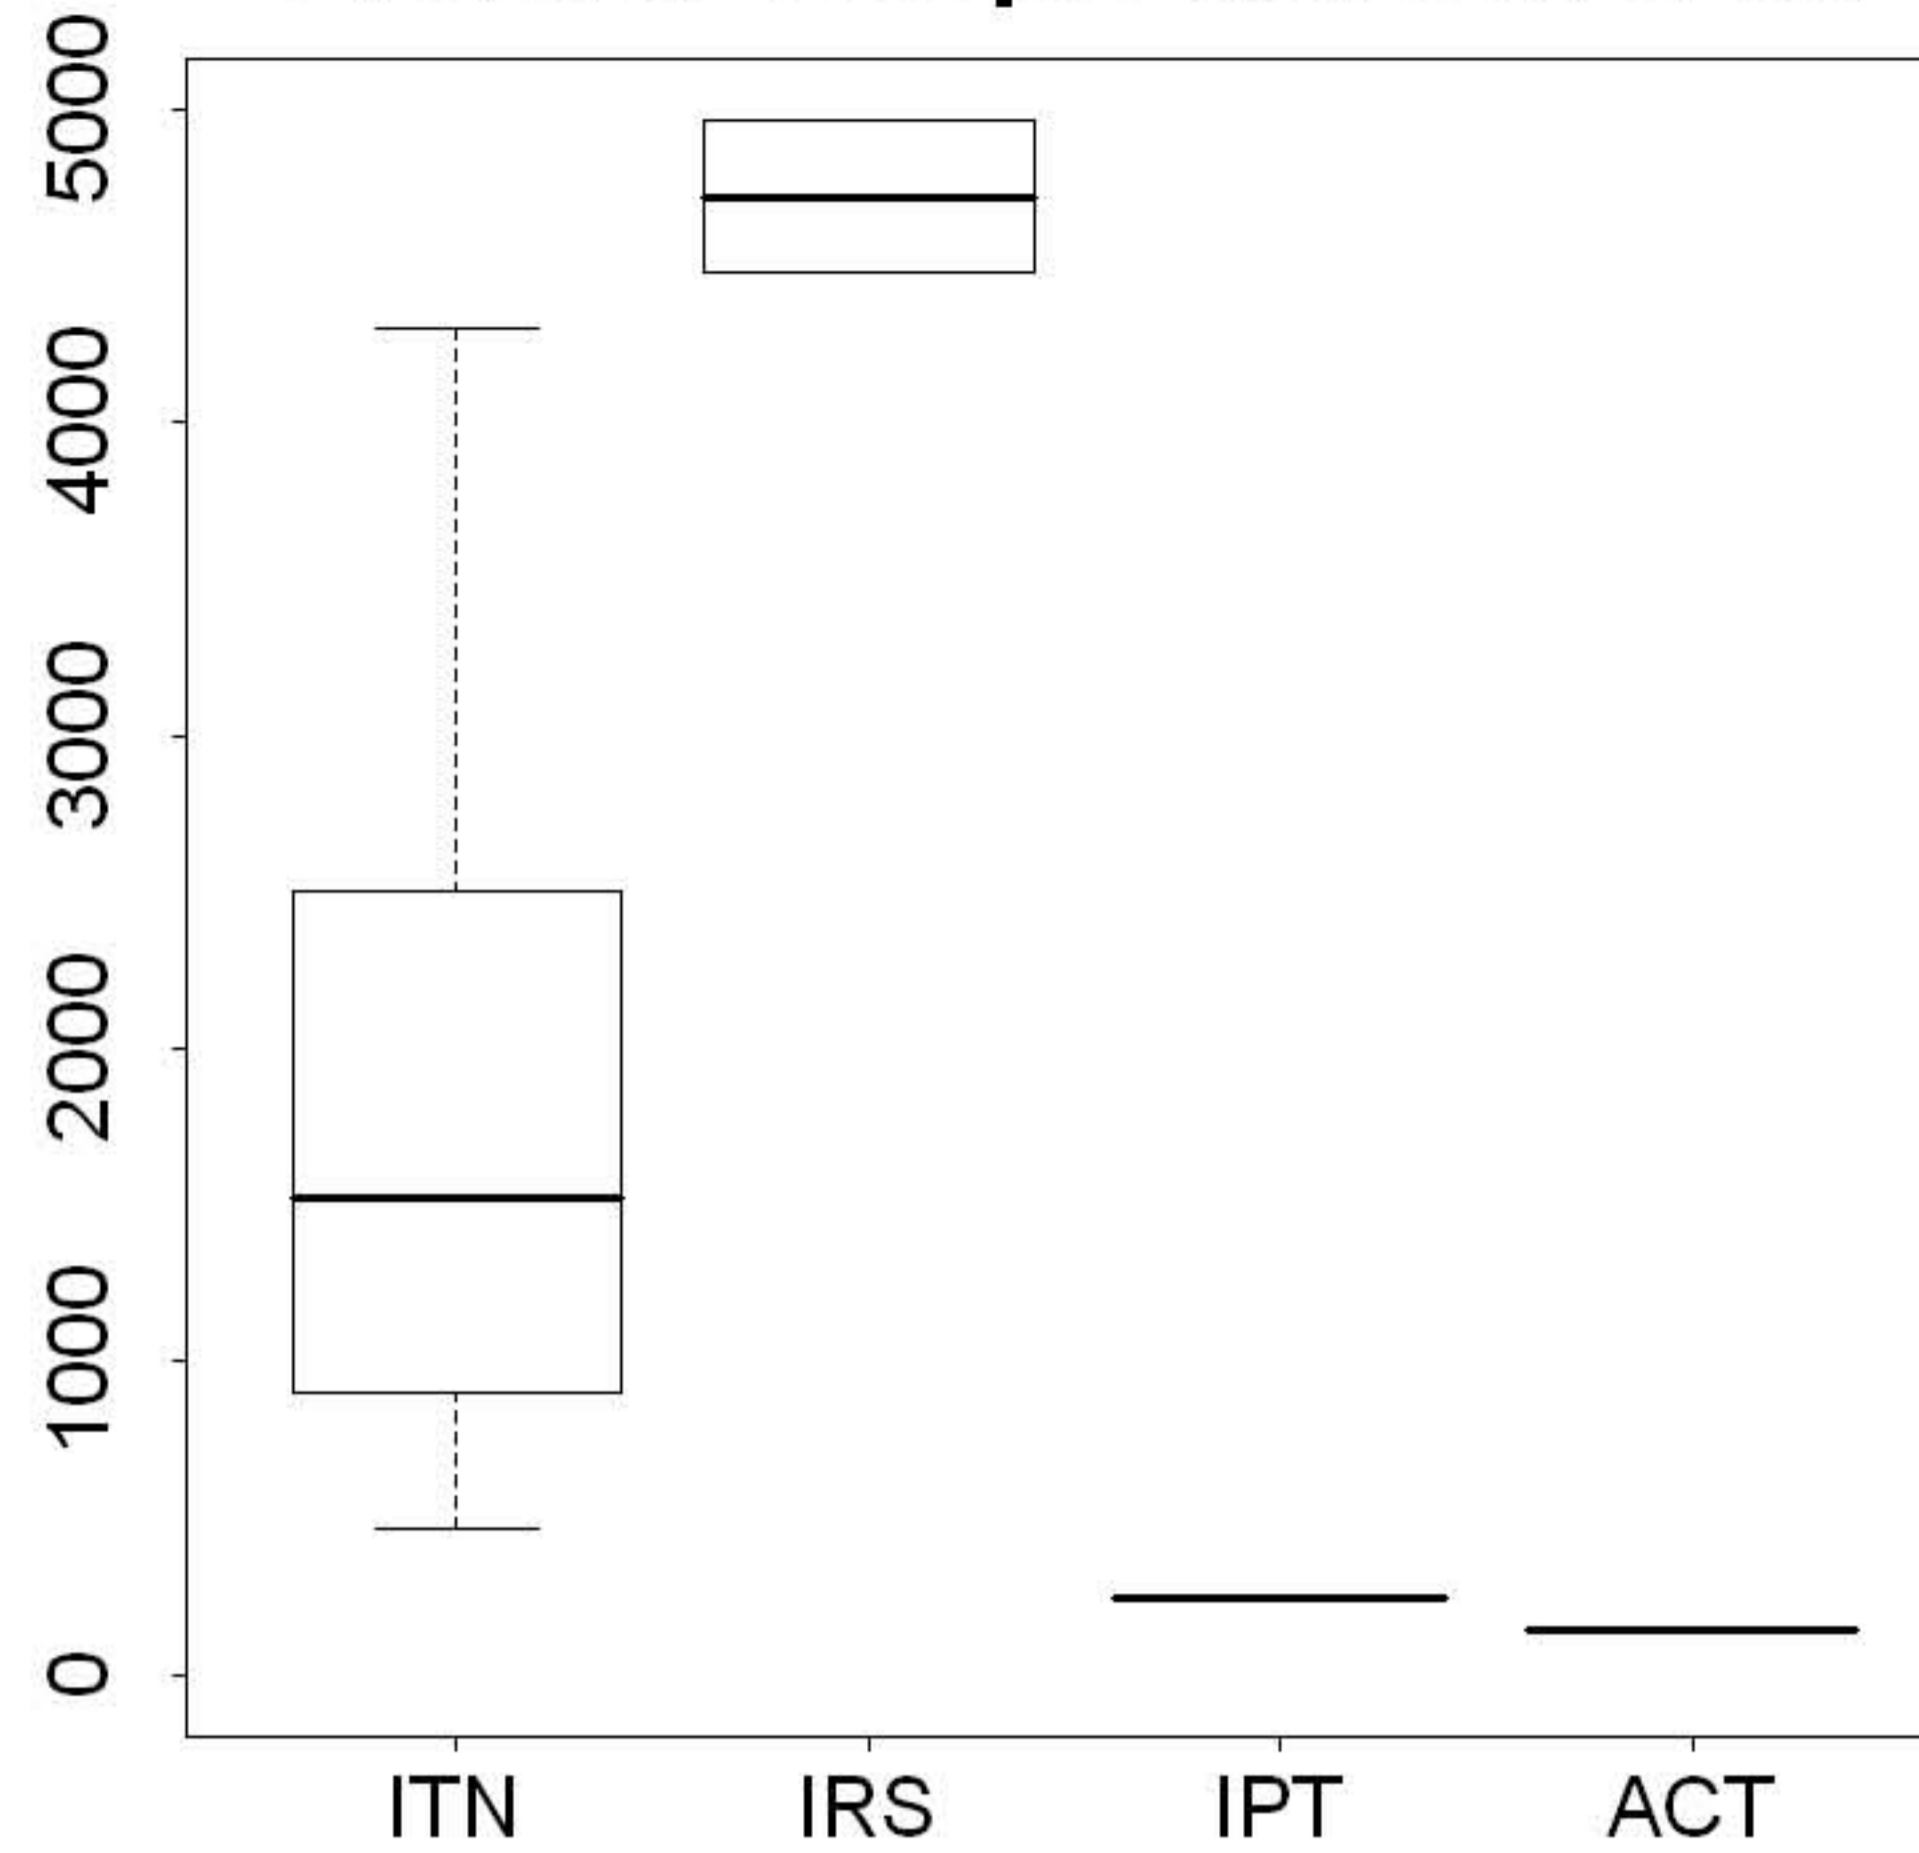**Provider cost per DALY averted**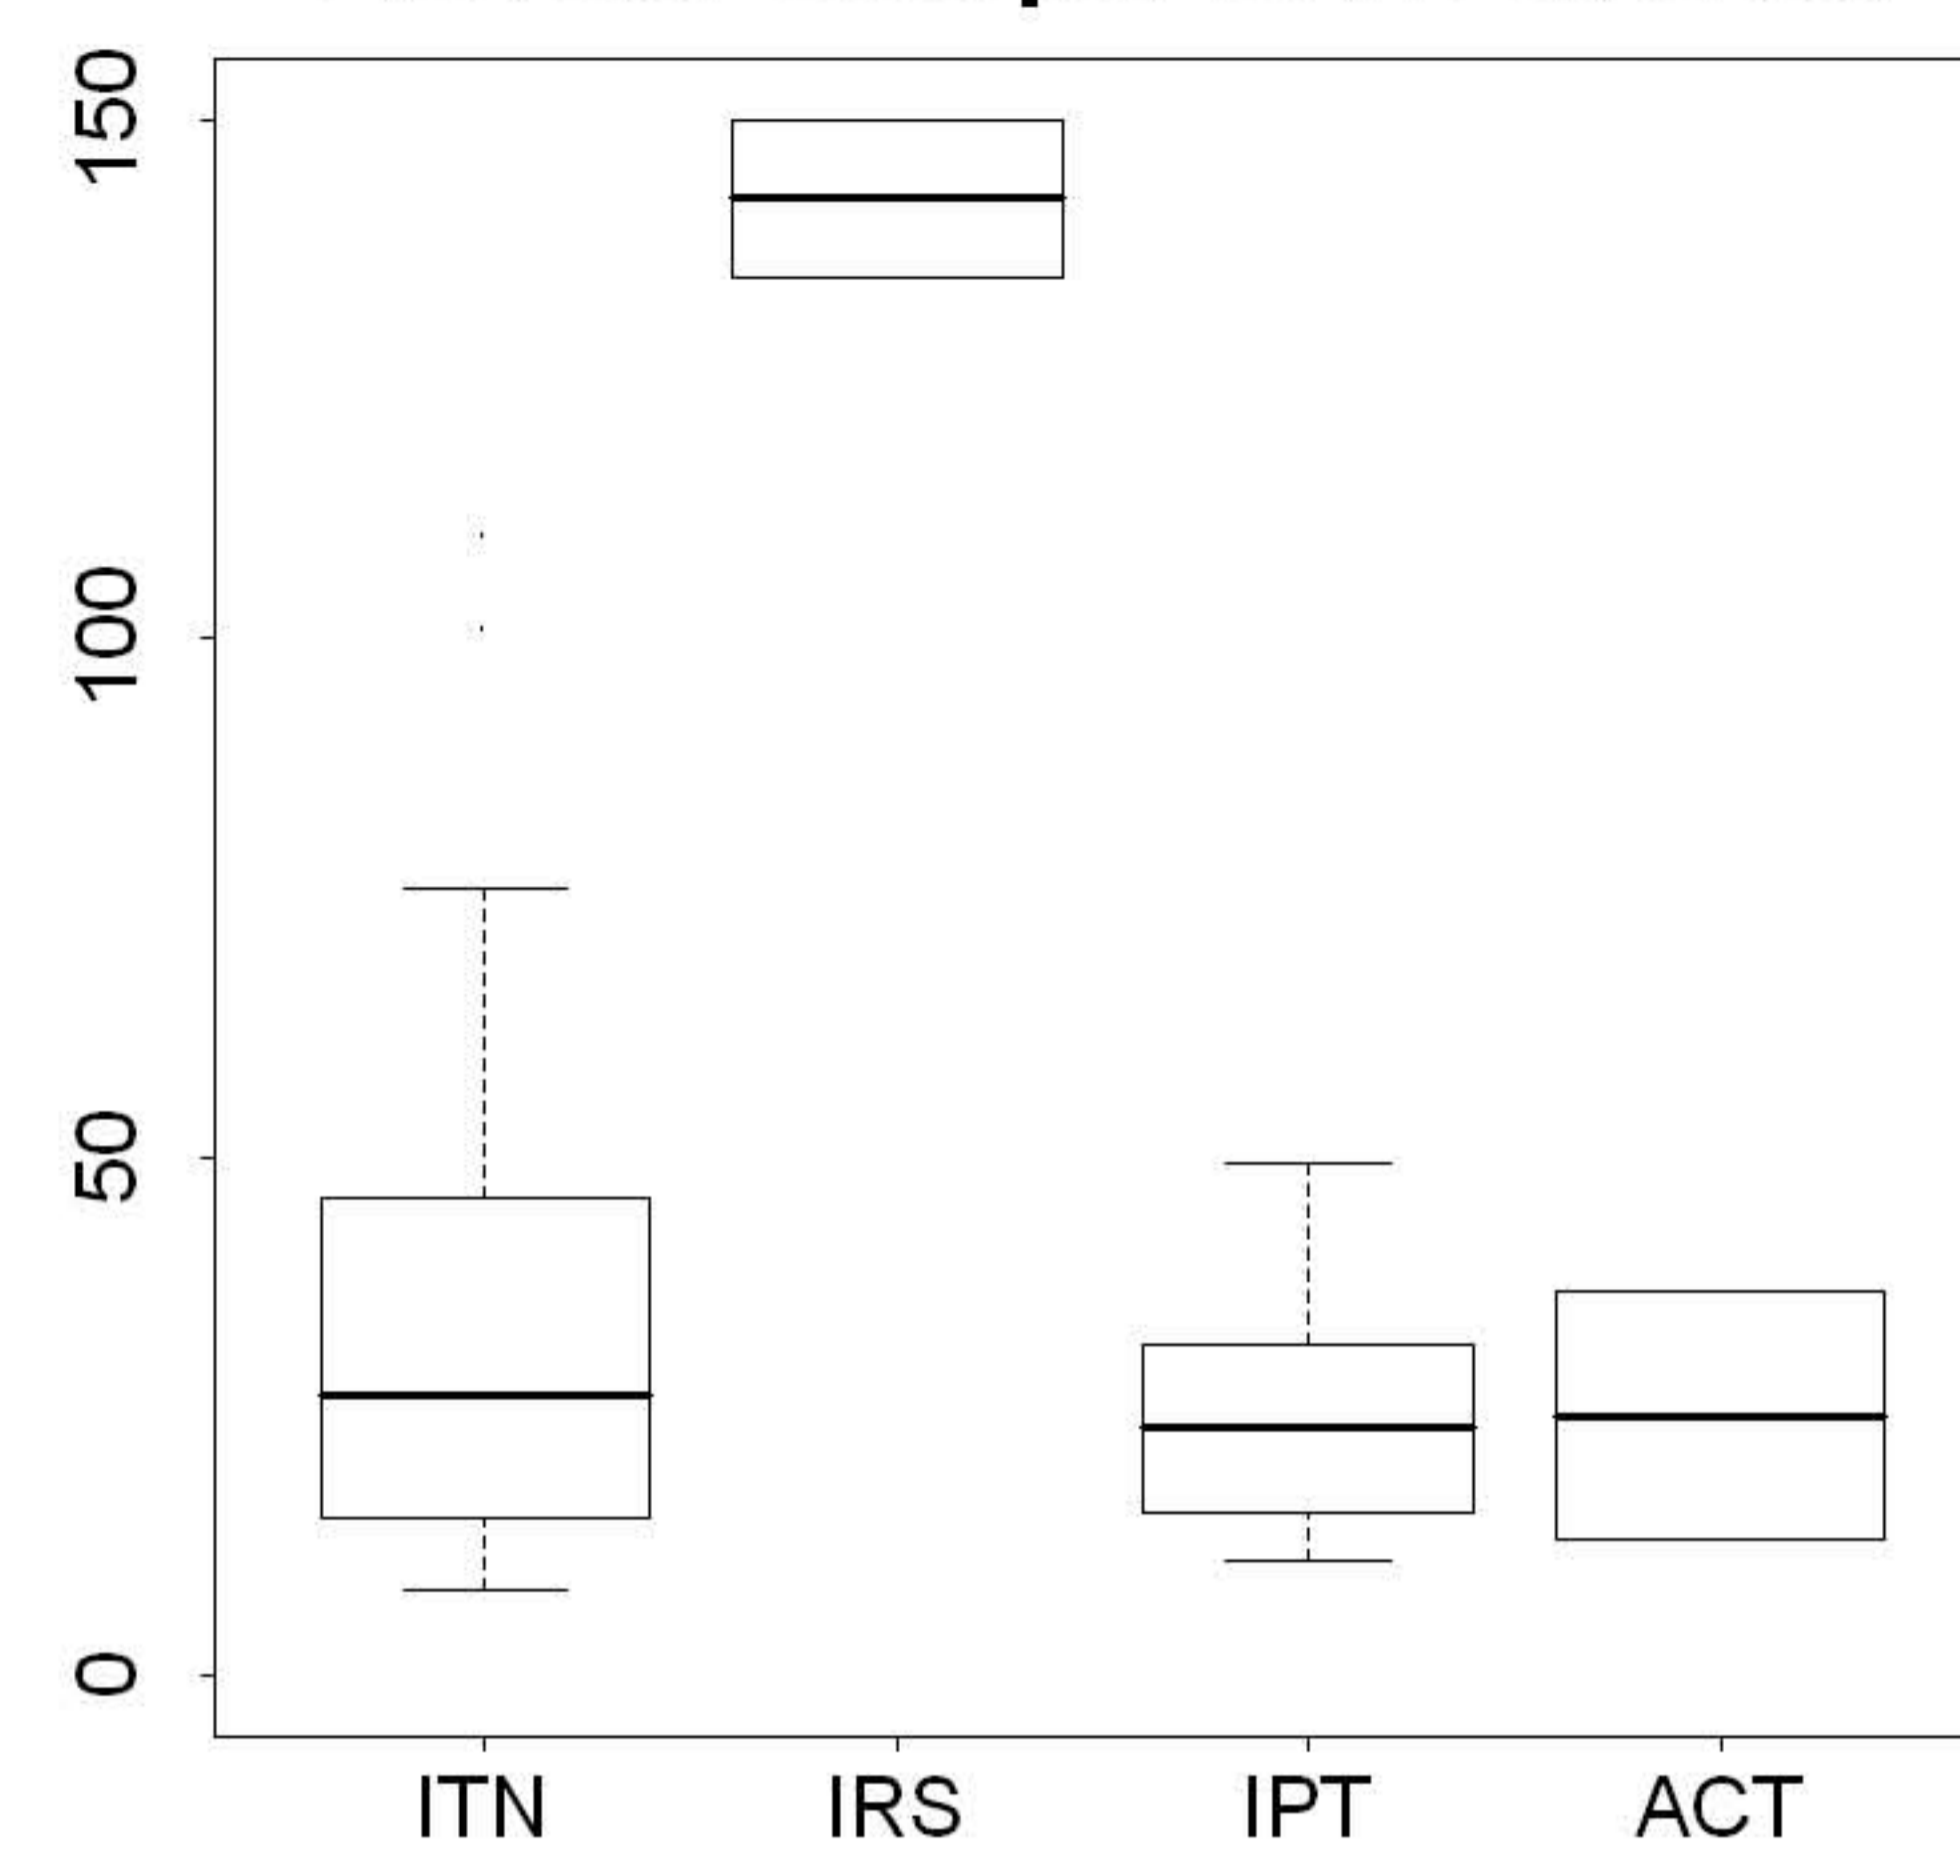**Societal cost per case averted**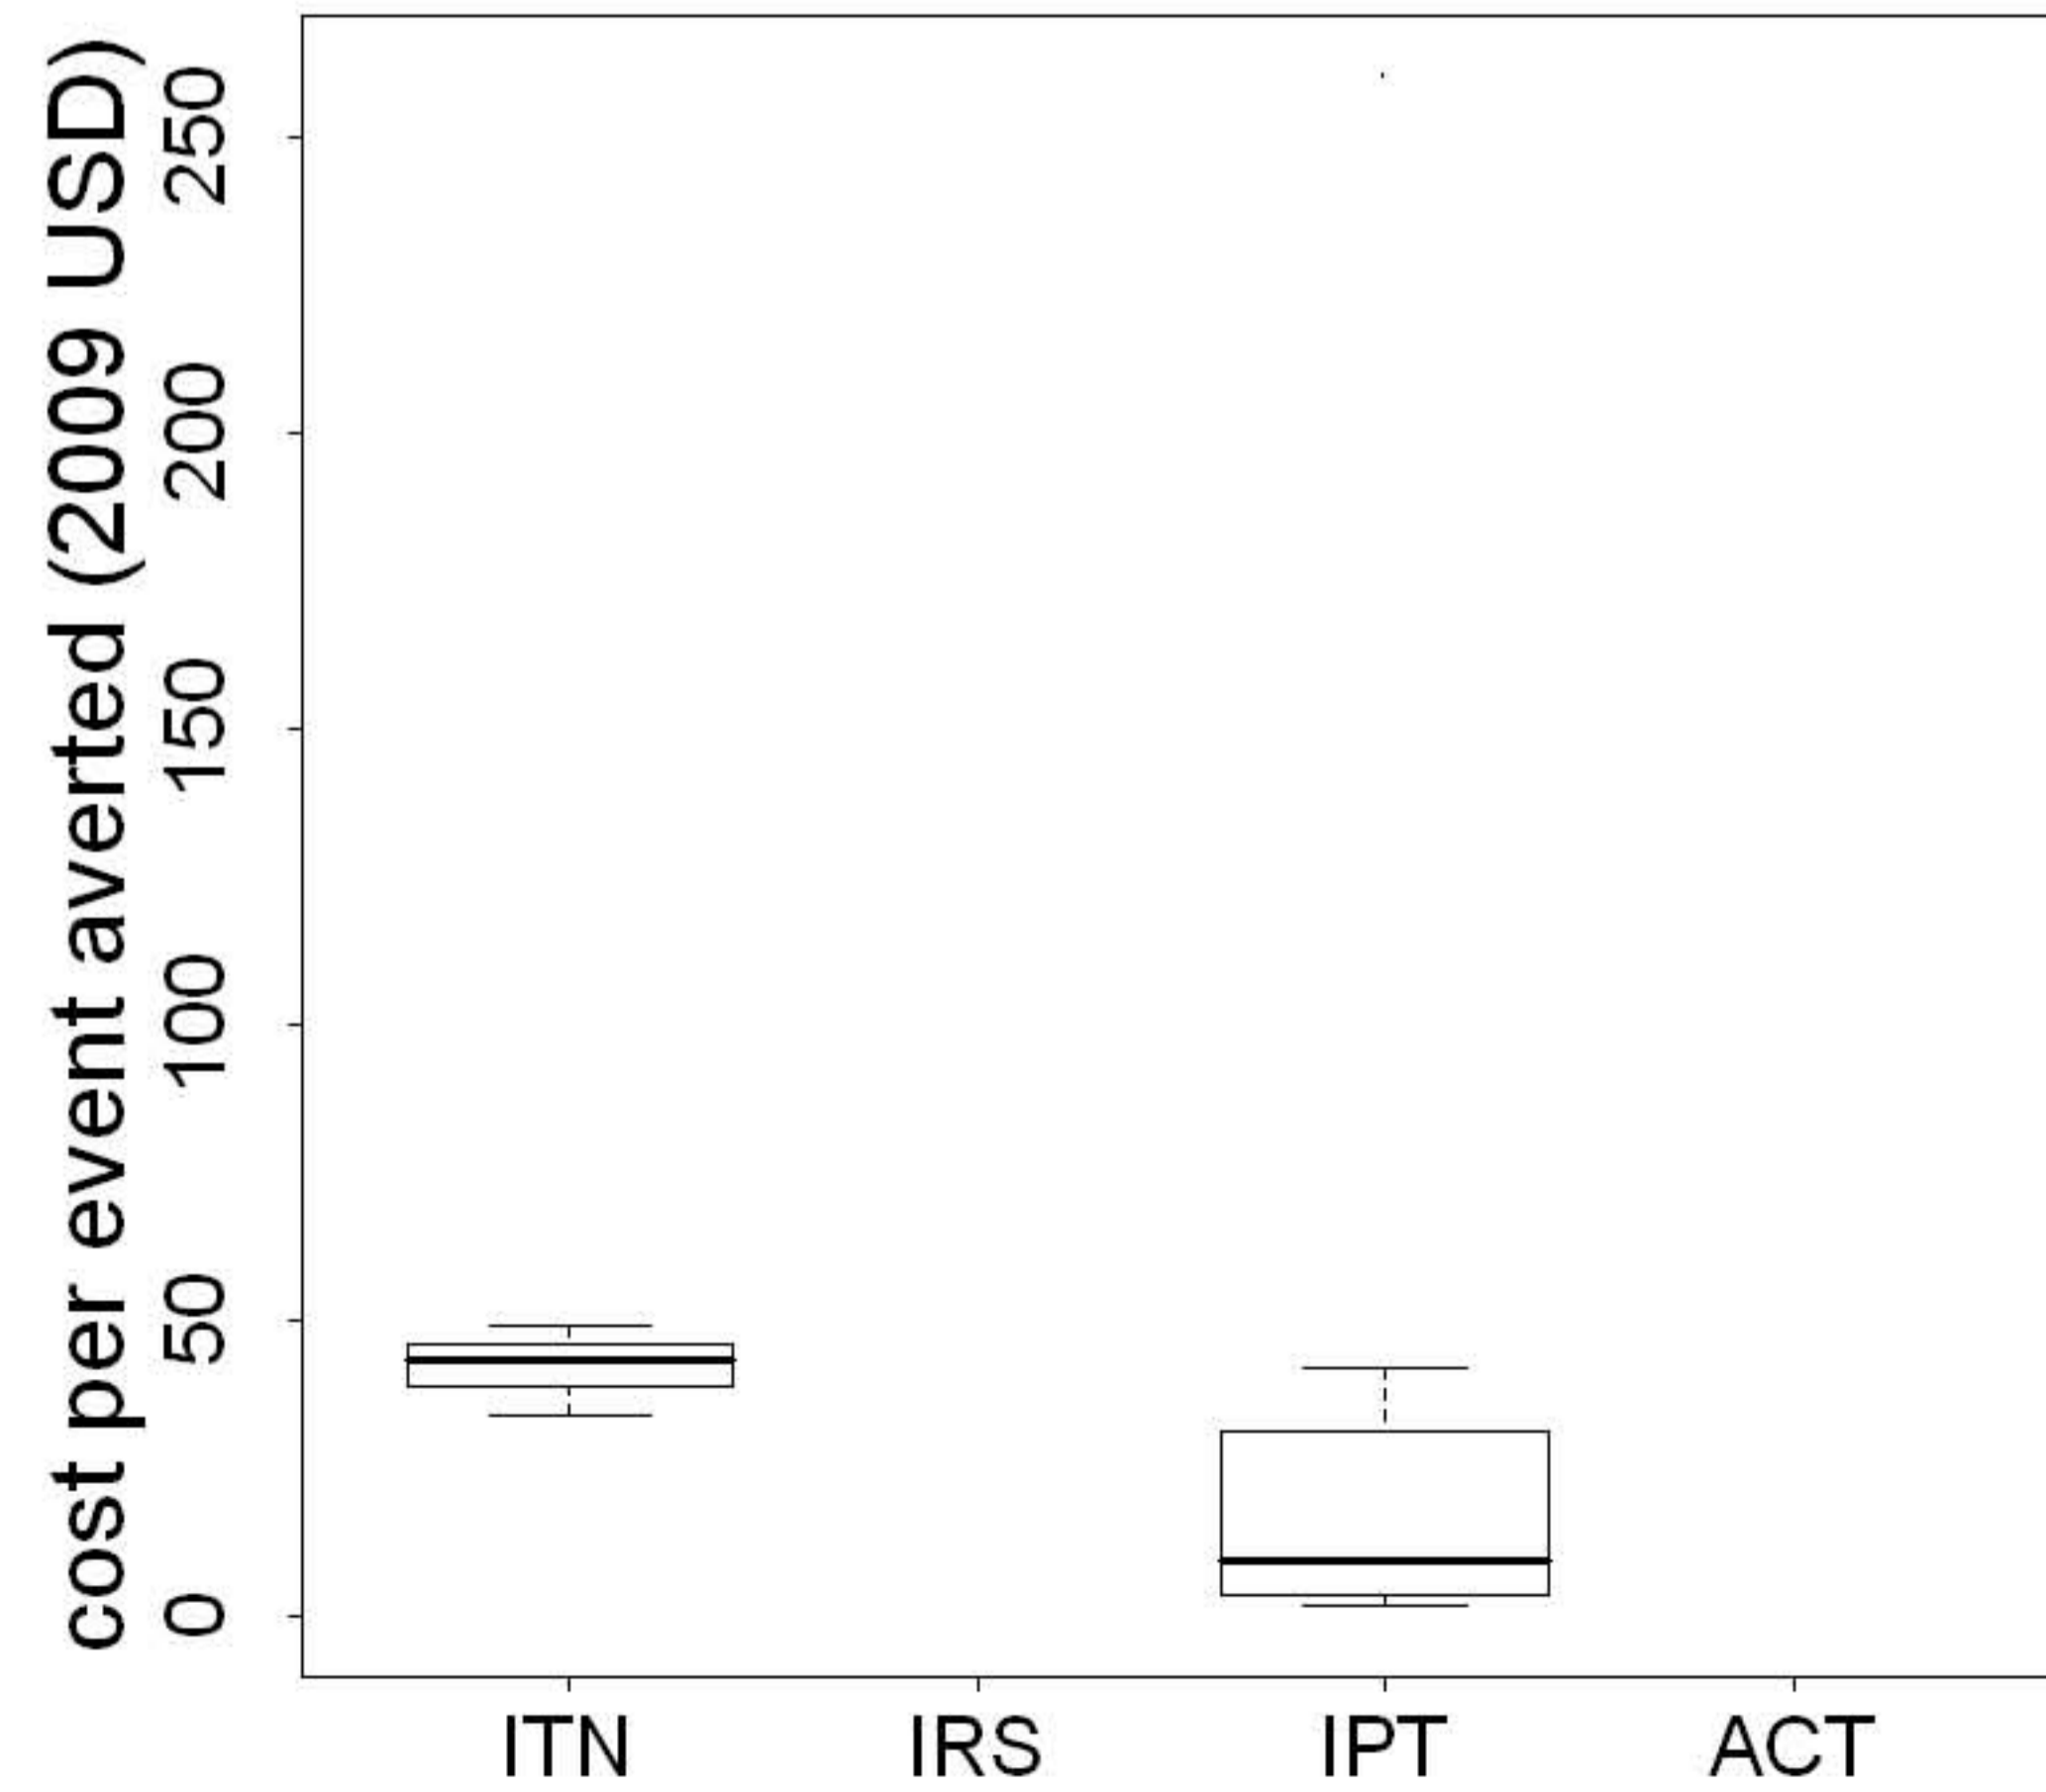**Societal cost per death averted**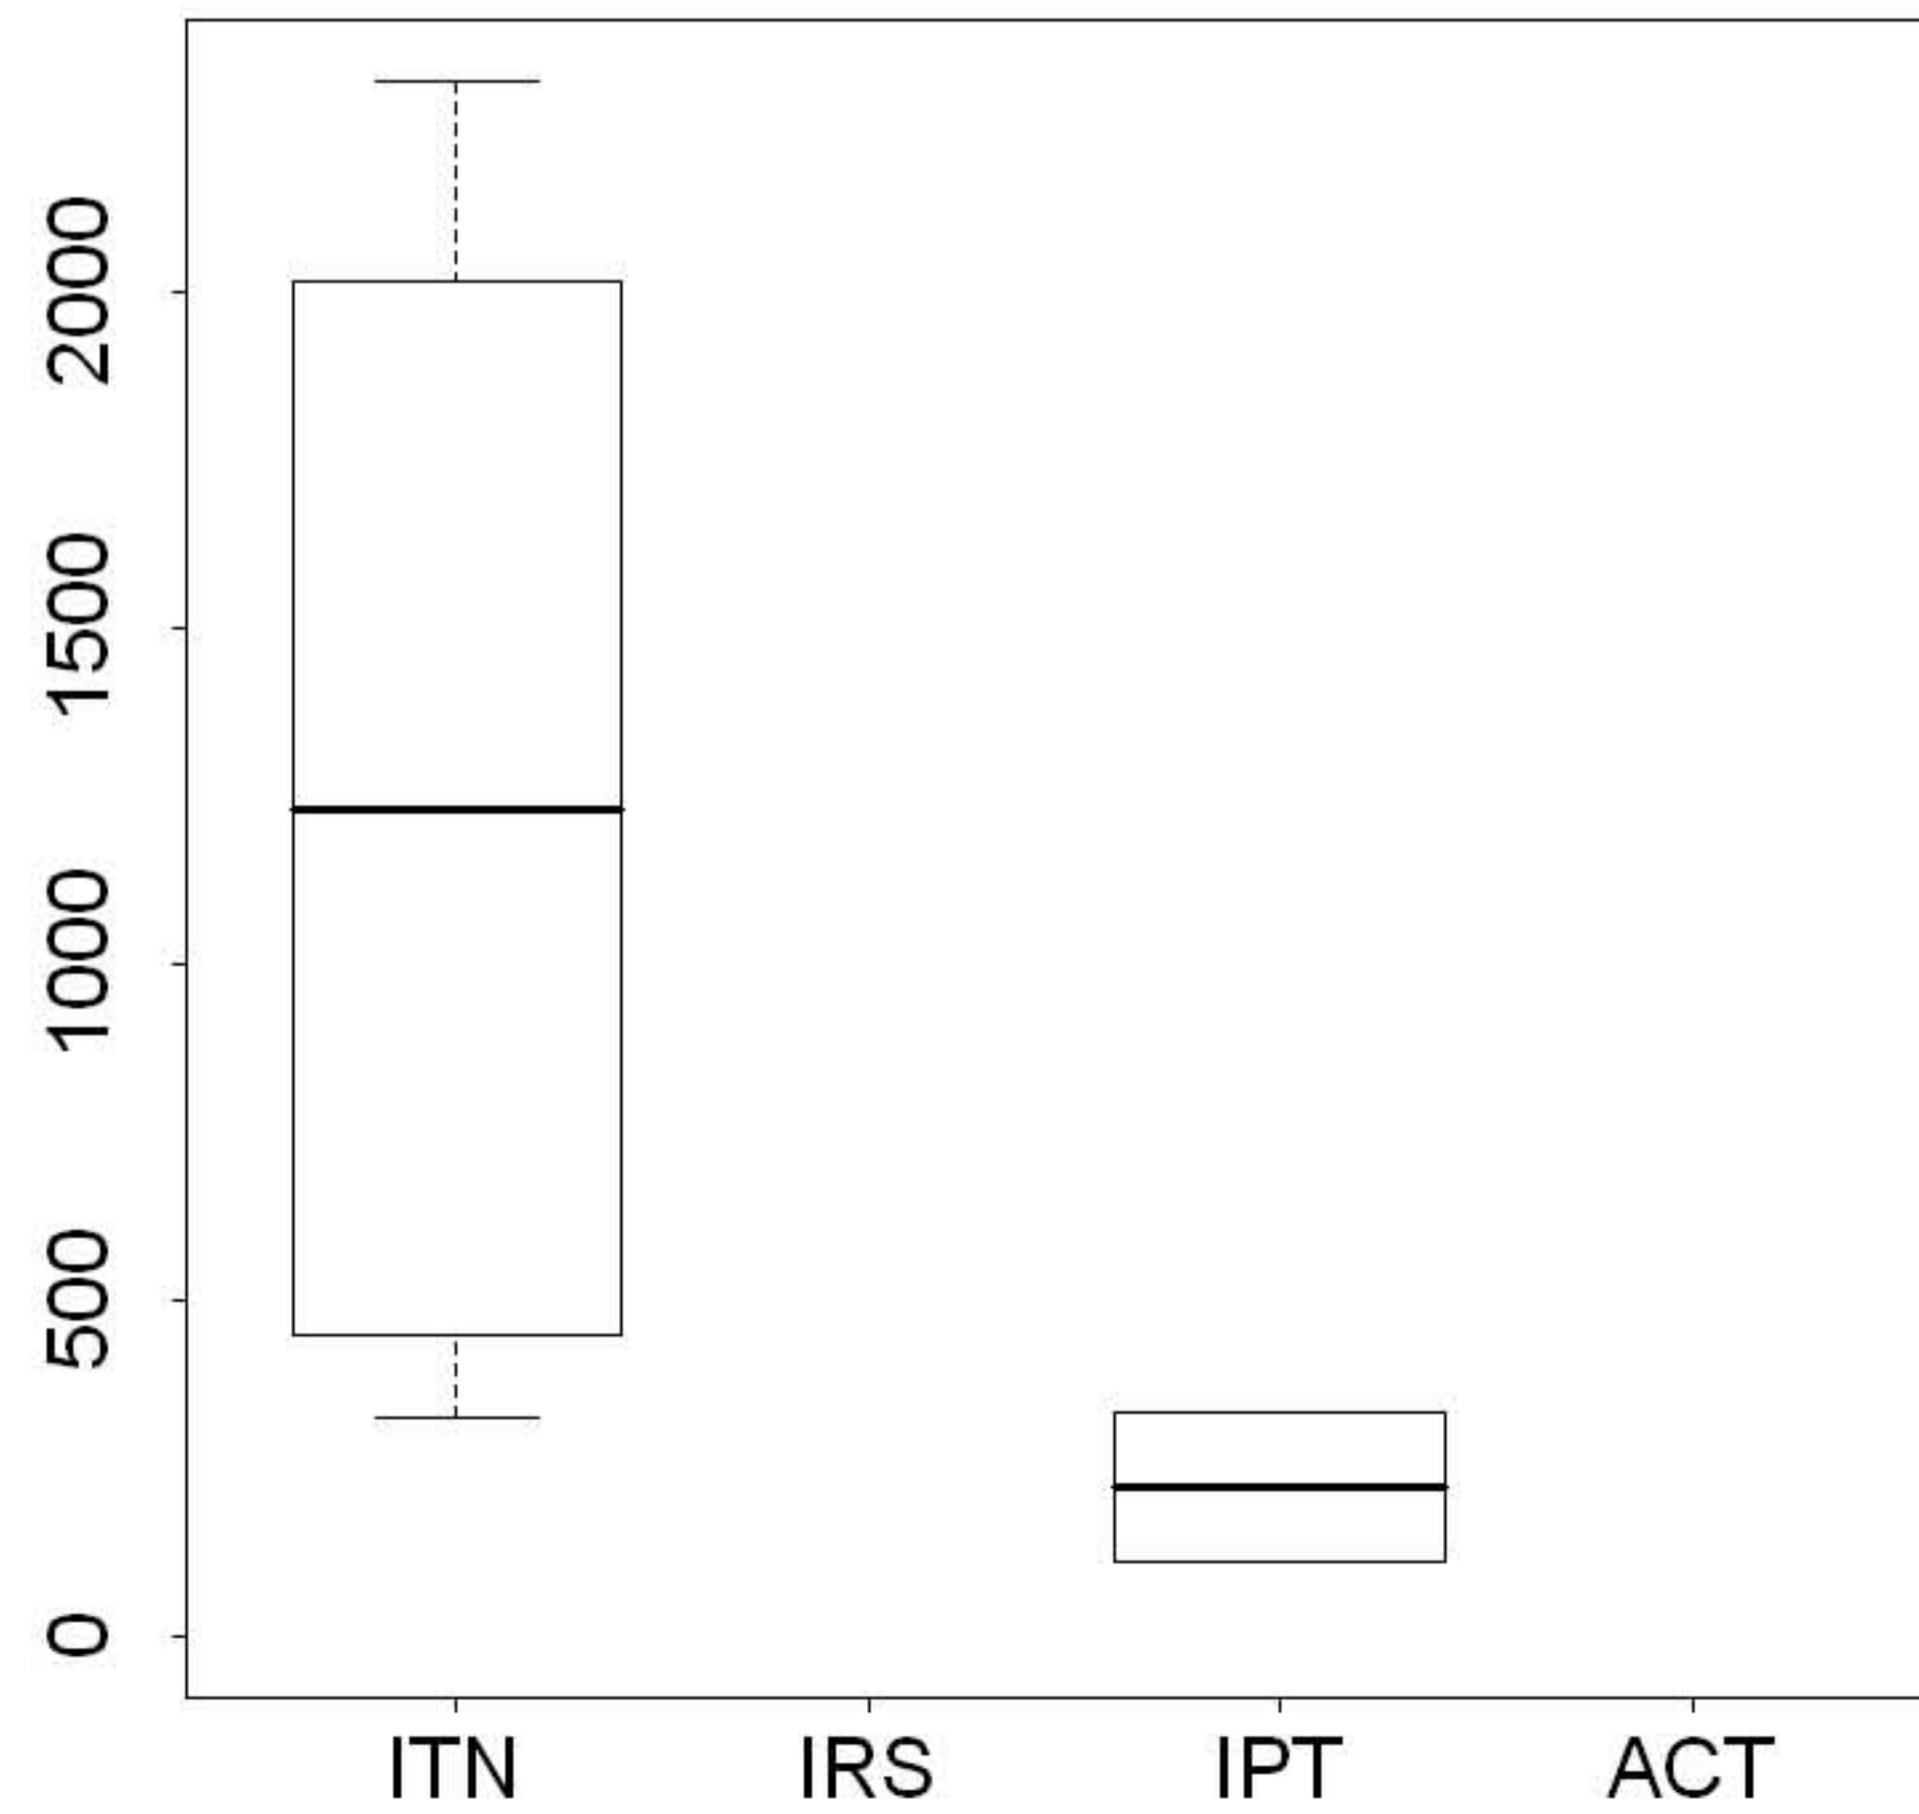**Societal cost per DALY averted**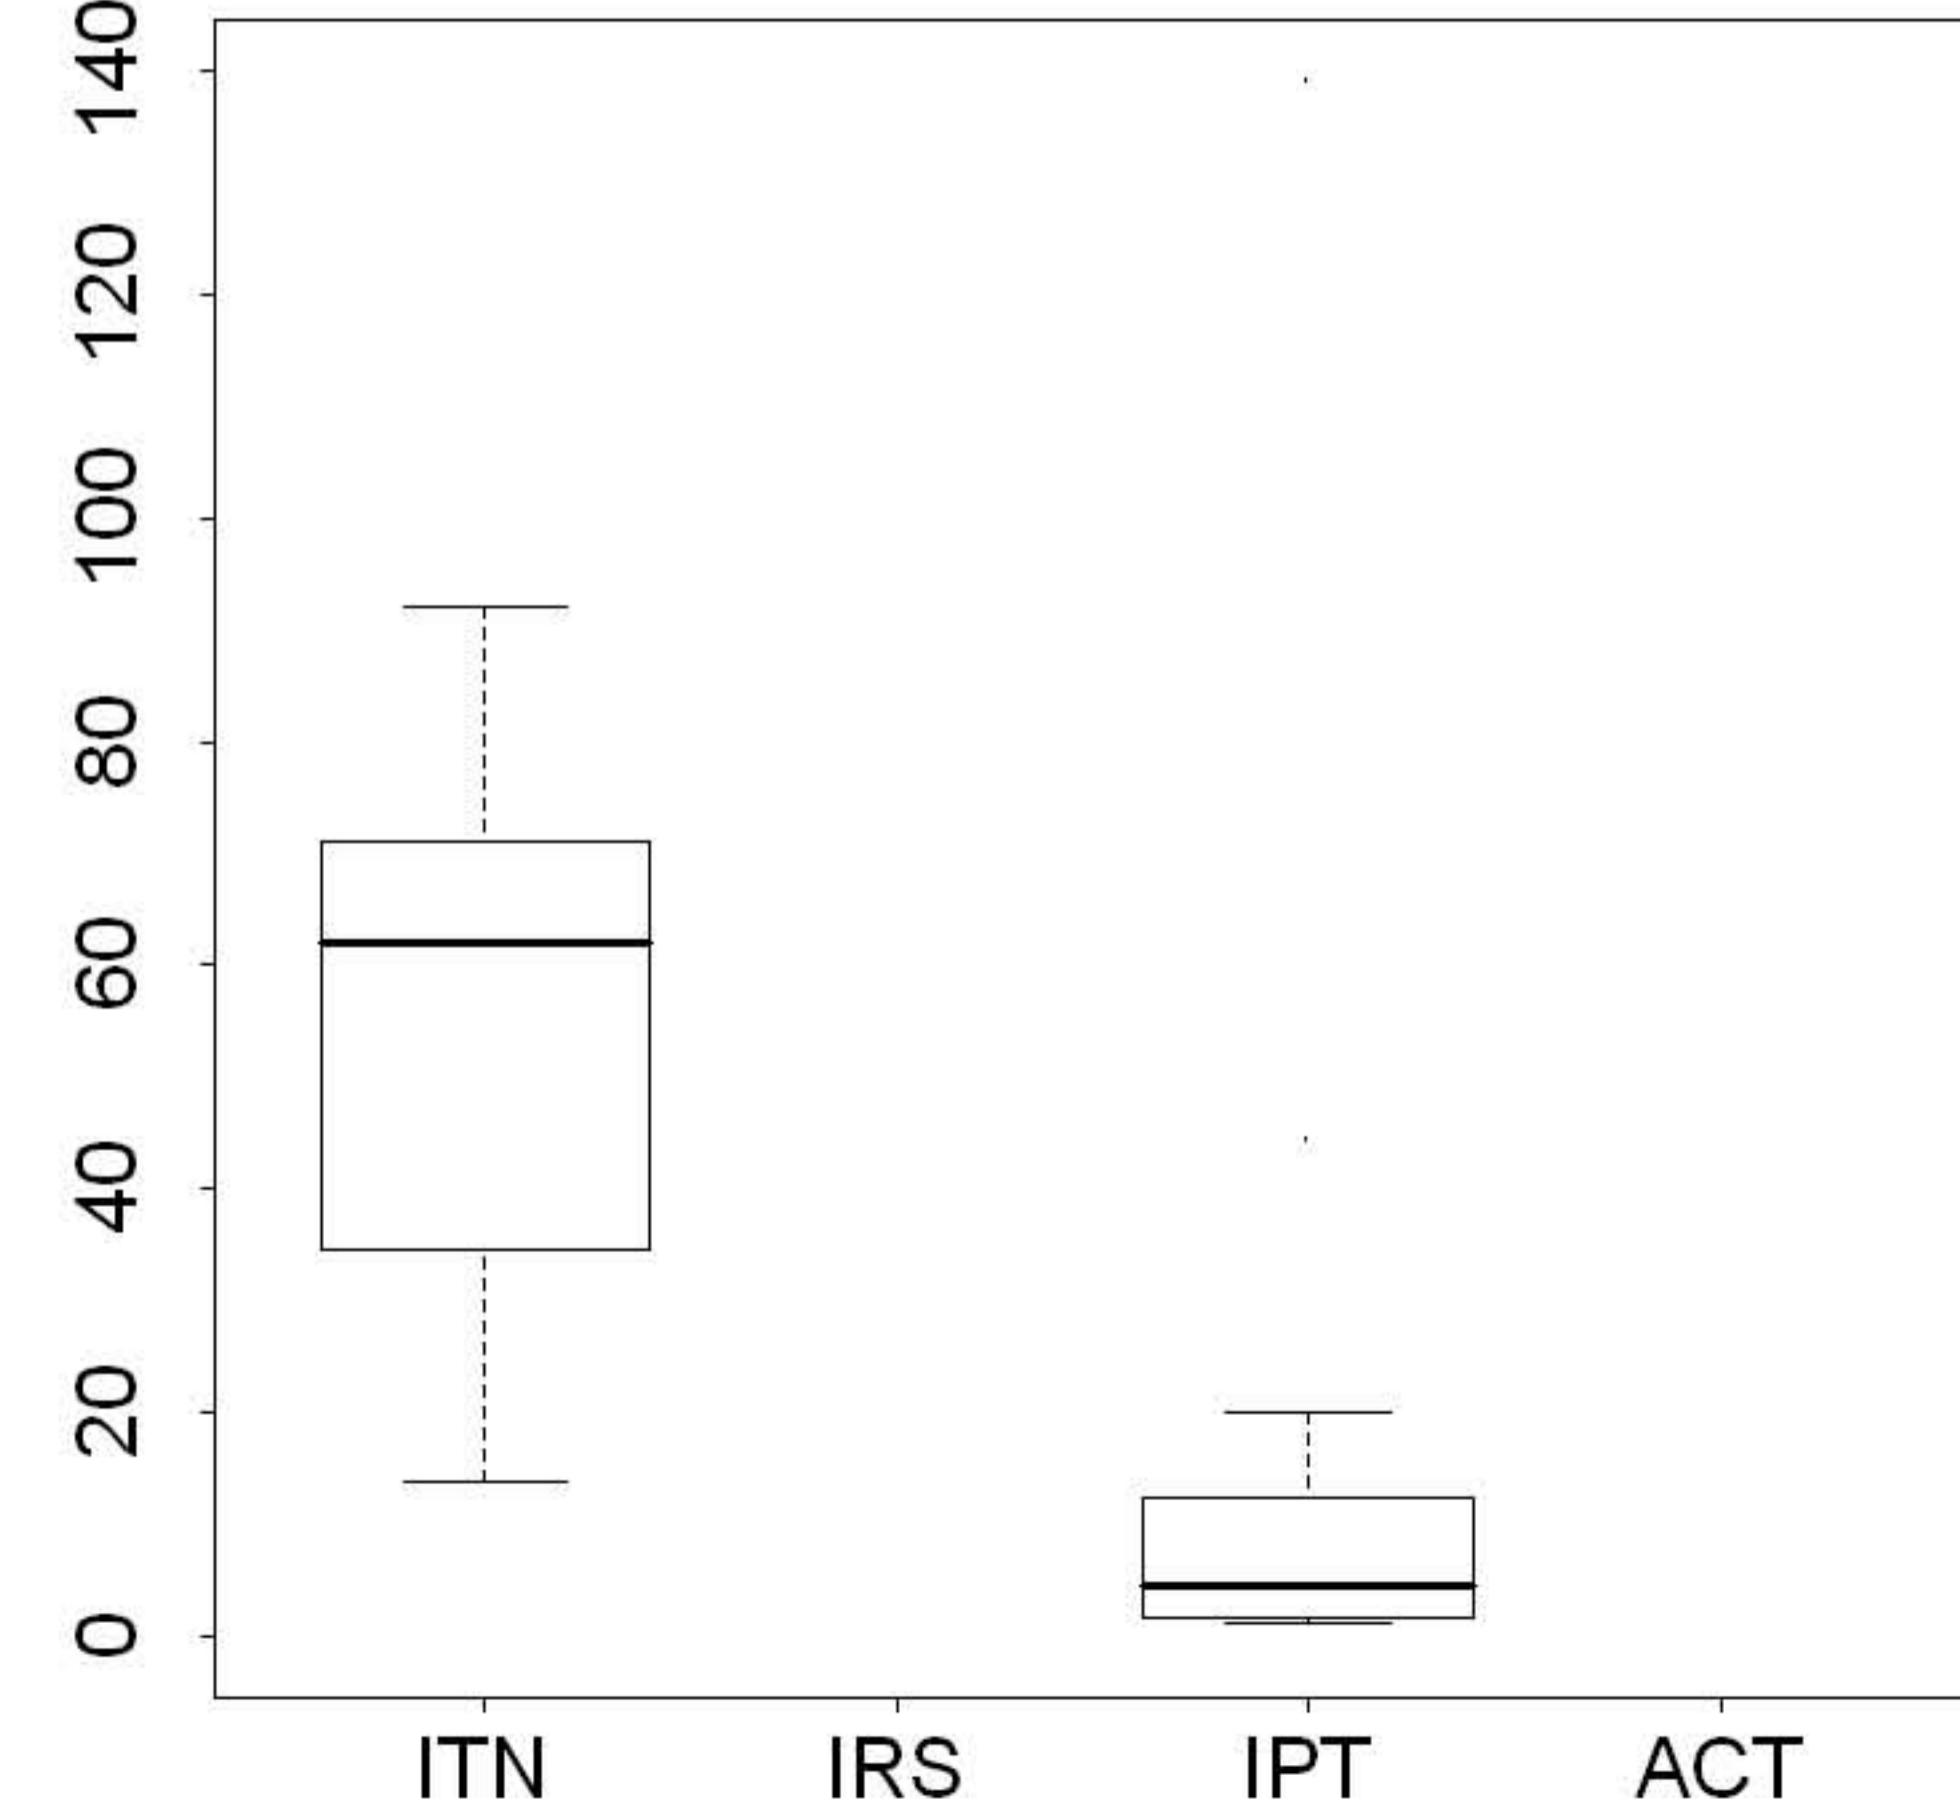

Supplement: MOESM14 [file 9542072]
